# Supplementary material for: From Waste to Catalyst: Transforming Mussel Shells into a Green Solution for Biodiesel Production from Jatropha curcas Oil
Source: MDPI journal article supplement (doi:10.3390/catal14010059), 2024-01-12
Supplement: s1 [file s1]

# From Waste to Catalyst: Transforming Mussel Shells into a Green Solution for Biodiesel Production from *Jatropha curcas* Oil

Halimah A. Alsabi <sup>1</sup>, Manal E. Shafi <sup>2,\*</sup>, Suad H. Almasoudi <sup>3</sup>, Faten A. M. Mufti <sup>3</sup>, Safaa A. Alowaidi <sup>1</sup>,  
Somia E. Sharawi <sup>1</sup> and Alaa A. Alaswad <sup>4</sup>

<sup>1</sup> Department of Biology, Faculty of Sciences, King Abdulaziz University, Jeddah 21589, Saudi Arabia;  
halsabee@stu.kau.edu.sa (H.A.A.); saalowadhi@kau.edu.sa (S.A.A.);  
sesharawi@kau.edu.sa (S.E.S.)

<sup>2</sup> Sustainable Agriculture Production Research Group, Department of Biological Sciences, Zoology,  
King Abdulaziz University, Jeddah 21589, Saudi Arabia

<sup>3</sup> Department of Biology, Faculty of Sciences, Umm Al-Qura University, Makkah, Saudi Arabia; shmasuadi@uqu.edu.sa (S.H.A.); famufti@uqu.edu.sa (F.A.M.M.)

<sup>4</sup> Department of Biological Sciences, Faculty of Sciences, University of Jeddah, Jeddah, Saudi Arabia;  
aalaswad@uj.edu.sa

\* Correspondence: meshafi@kau.edu.sa

Supplementary figures:

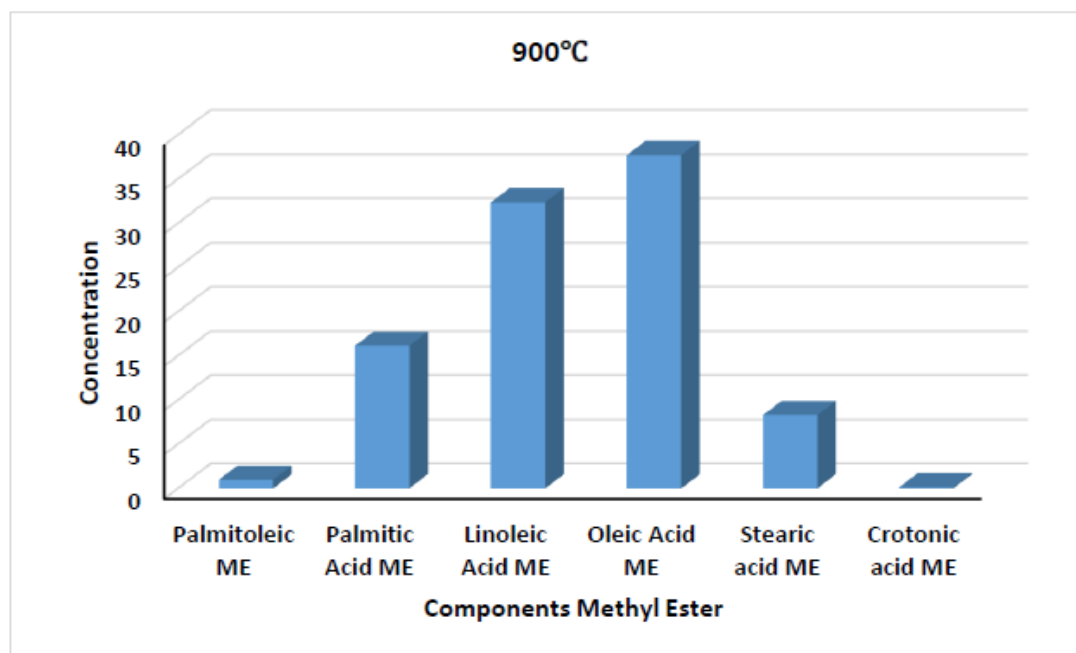

**Figure S1.** Composition of methyl ester in biodiesel at different calcined catalyst temperature by GC-MS.
